# Supplementary material
Source: publisher site journal article supplement (https://www.dovepress.com/article/267354)
Supplement: Supplementary file 1 [file get_supplementary_file.php]

**Supplemental data**

**Table S1.** **Document with detailed information about colonoscopy and computed tomographic colonography (CTC)**

|  | **Colonoscopy** | **CT colonoscopy** | |
| --- | --- | --- | --- |
| Examination methods | This is an exam to check the inside of the large intestine with an endoscope inserted from the anus. | This is an exam which uses a CT scan to check the large intestine after it has been inflated with gas,  This is an exam in which images of the large intestine similar to those of colonoscopy can be obtained without inserting an endoscope. | |
| Volume of cleansing solution and medicine for bowel preparation | • 1500-2500ml  Diet restrictions, additional laxative, or bowel cleaning solution may be required. | **Standard preparation** | **Reduced-laxative preparation** |
| • 2000ml  The last 400 ml of the solution contains 20ml of a contrast agent.  An additional laxative or bowel cleaning agent may be required. | • 800-1000ml  The solution contains 40-60ml of a contrast agent.  Diet restrictions, additional laxative, bowel cleaning solution, or digestive medicine (mosapride) may be required. |
| Timing of drinking the cleaning solution | In the morning of the day of exam | In the morning of the day of exam | In the day before exam or the morning on the day of the exam |
| Certainty of diagnosis | This exam is good for detecting polyps and cancers because it allows direct observation of the inside of the large intestine. | The diagnostic performance is almost the same as that of colonoscopy for polyps and cancers 6 mm or larger, which generally require treatment. However, the diagnostic performance is inferior for lesions 5 mm or smaller, or superficial lesions. | The diagnostic performance is almost the same as that of CT colonography with standard preparation, but it may be decreased if the bowel cleansing is not sufficient. |
| Acceptability of exam | The procedure may cause pain because insertion of an endoscope into the large intestine is required for observation.  Analgesics and sedatives will be provided, if requested. | This exam is performed after the bowel has been mildly inflated with gas, and the procedure then causes less discomfort. | |
| Duration of exam | 15-30 minutes  If sedatives are used, a rest time will be provided after the exam. | 10-20 minutes | |
| Injection at the time of exam | An injection of antispasmodics is given.  Analgesics and sedatives will be injected, if requested. | No antispasmodics, analgesics or sedatives are required. | |
| Cost of exam | The cost is approximately * yen (30% burden, * yen: 10% burden, * yen).  There will be a separate additional charge, if you undergo histopathological examination or have a polyp removed. | The cost is approximately * yen (30% burden, * yen: 10% burden, * yen).  There will be a separate additional charge, if you undergo further endoscopic examination. | |
| Advantages | If a lesion is detected, a sample of the lesion can be removed.  Polyps can be treated, but the treatment may be performed at a later date depending on lesion size and based on the physician’s judgement. | This exam provides an image of the entire large intestine, and the shape of the lesion and the positional relationships with other organs can be evaluated accurately.  Diseases of other abdominal organs may be detected.  IT can also be performed in patients who cannot undergo colonoscopy. | |
| Disadvantages | It is difficult to find lesions located in the blind angle of the endoscope, such as lesions behind intestinal folds.  Although very rare, large intestine hemorrhage or perforation can occur.  Examination of the entire large intestine may not be possible in patients with adhesions due to abdominal surgery, etc., or in those with an exceptionally long bowel. Is this exam cannot be performed, another exam will be required. | Tissue cannot be removed.  In other countries, cases of large bowel perforation during the procedure have been reported, although no such events have occurred in Japan.  The rate of complications in lower than that of colonoscopy. If a lesion requiring treatment is detected, additional endoscopy is needed.  There is exposure to radiation, but the amount is small. | |

* Regarding the cost of examination, the actual costs in individual institutions were described and used for analysis.

**Table S2**. **Response options for the reason for choice of examination**

| **Question** | **Response options** |
| --- | --- |
| Why did you choose colonoscopy for colonic examination? (multiple answers possible) | □I think colonoscopy has higher diagnostic accuracy.  □I think colonoscopy is a safe procedure.  □I think colonoscopy is comfortable.  □I can be administered sedative medications during the procedure.  □Biopsy samples can be obtained and colorectal polyps can be removed if detected during the procedure.  □Colonoscopy was comfortable for me in my past experiences.  □CTC was uncomfortable for me in my past experiences.  □Colonoscopy has no radiation exposure.  □I think colonoscopy is cost-effective.  □Other reason as follows:…………… |
| Why did you choose computed tomographic colonography (CTC) for colonic examination? (multiple answers possible) | □Reduced bowel preparation method is available for CTC.a  □I think CTC has sufficient diagnostic accuracy.  □I think CTC is a safe procedure.  □I think CTC is comfortable.  □I can avoid sedative medications for the procedure.  □Information can be obtained about other abdominal organs.  □CTC was comfortable for me in my past experiences.  □Colonoscopy was uncomfortable for me in my past experiences.  □CTC is cost-effective.  □Other reason as follows:…………... |

aParticipants who selected CTC with full-laxative preparation could not choose this response option.

**Table S3. Questions and response options about the experience of colonoscopy or computed tomographic colonography (CTC)**

| **Question** | **Response options** |
| --- | --- |
| Q1. Was it difficult to drink the laxative for bowel preparation? | 1. Easy 2. Somewhat easy 3. Neutral 4. Somewhat difficult 5. Very difficult |
| Q2. How would you rate your experience with the colonic exam? | 1. Easy 2. Somewhat easy 3. Neutral 4. Somewhat difficult 5. Very difficult |
| Q3. Which part(s) of the colonic exam caused discomfort? (multiple answers possible) | For those who chose CTC  1. None 2. Gas insufflation of the intestines 3. Having to hold my breath during the scan 4. Having to roll over into different positions 5. Pain 6. Duration of the procedure 7. Others:  For those who chose colonoscopy  1. None 2. Gas insufflation of the intestines 3. Use of the sleep drug (sedative) 4. Insertion of the endoscope 5. Pain 6. Duration of the procedure 7. Others |
